# Supplementary material for: Microbial metabolite sodium butyrate enhances the anti-tumor efficacy of 5-fluorouracil against colorectal cancer by modulating PINK1/Parkin signaling and intestinal flora
Source: PubMed Central journal article supplement (PMC11156851; doi:10.1038/s41598-024-63993-x), 2024-06-06

**Microbial Metabolite Sodium Butyrate Enhances the Anti-tumor Efficacy of 5-fluorouracil Against Colorectal Cancer by Modulating PINK1/Parkin Signaling and Intestinal Flora**

Yangbo Li, <sup>†a,b</sup> Pengzhan He, <sup>†a,b</sup> Ying Chen, <sup>†a,b</sup> Jiaming Hu, <sup>a,b</sup> Beiying Deng, <sup>a,b</sup> Chuan Liu, <sup>a,b</sup> Baoping Yu <sup>\*a</sup> and Weiguo Dong, <sup>\*a</sup>

<sup>a</sup>Department of Gastroenterology, Renmin Hospital of Wuhan University, Wuhan, China

<sup>b</sup>Central Laboratory, Renmin Hospital of Wuhan University, Wuhan, China

\*Correspondence

Baoping Yu, Department of Gastroenterology, Renmin Hospital of Wuhan University, No. Zhang Zhi-dong Road, Wuhan 430060, Hubei Province, PR China. Email: [yubp62@163.com](mailto:yubp62@163.com)

Weiguo Dong, Department of Gastroenterology, Renmin Hospital of Wuhan University, No. Zhang Zhi-dong Road, Wuhan 430060, Hubei Province, PR China. Email: [dongweiguo@whu.edu.cn](mailto:dongweiguo@whu.edu.cn)

<sup>†</sup>Yangbo Li, Pengzhan He, and Ying Chen contributed equally to this study.

# Original images of Representative Western blot

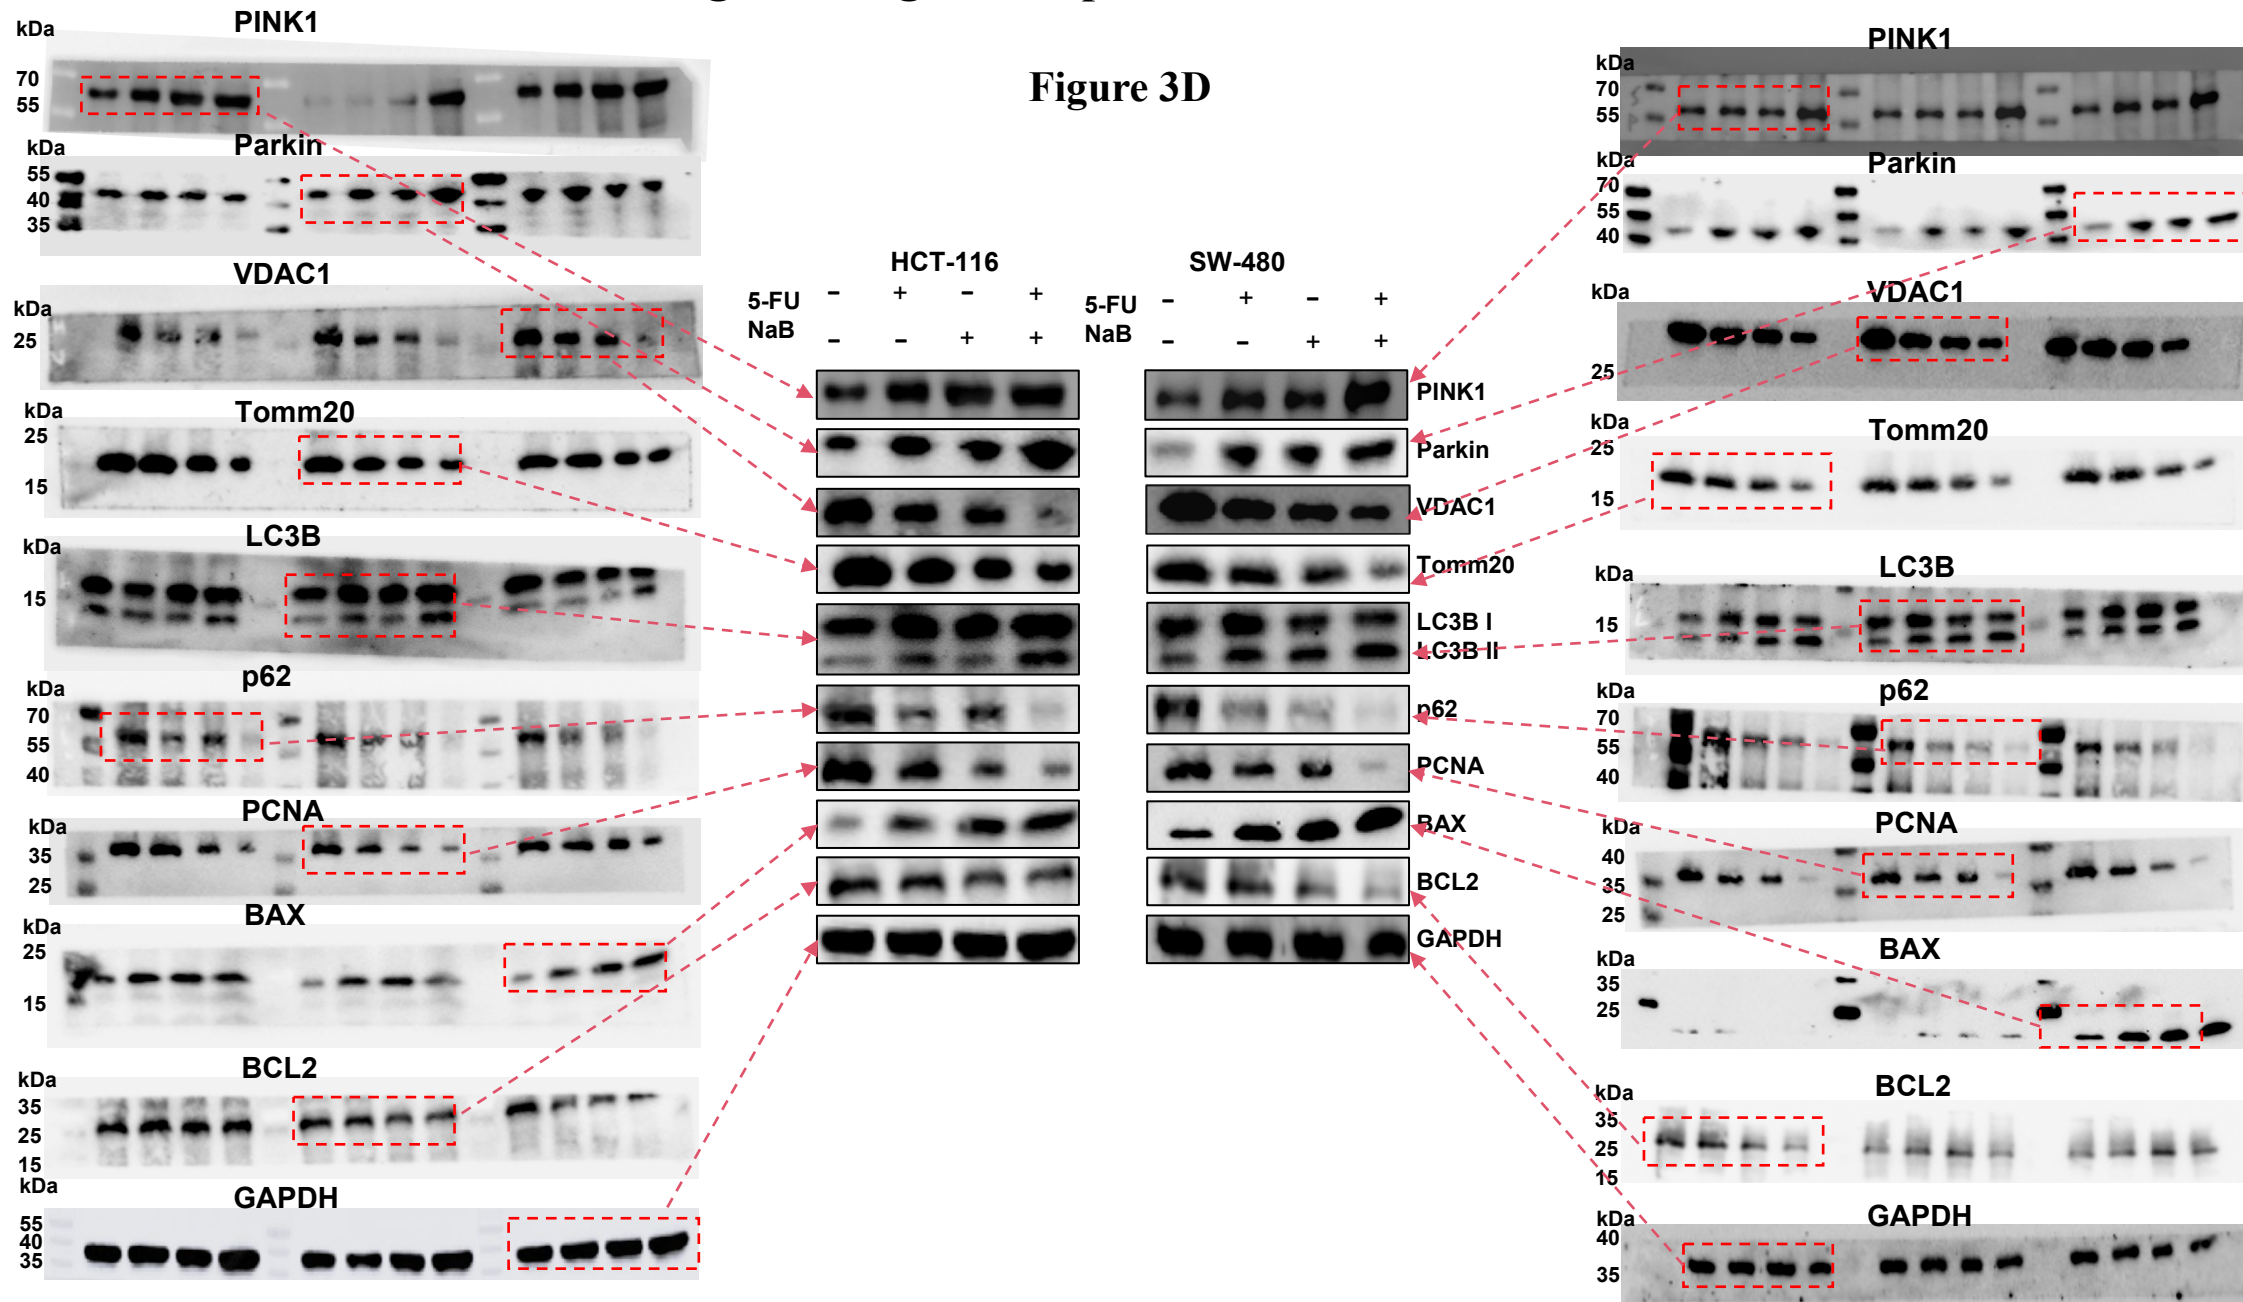

Figure 5B

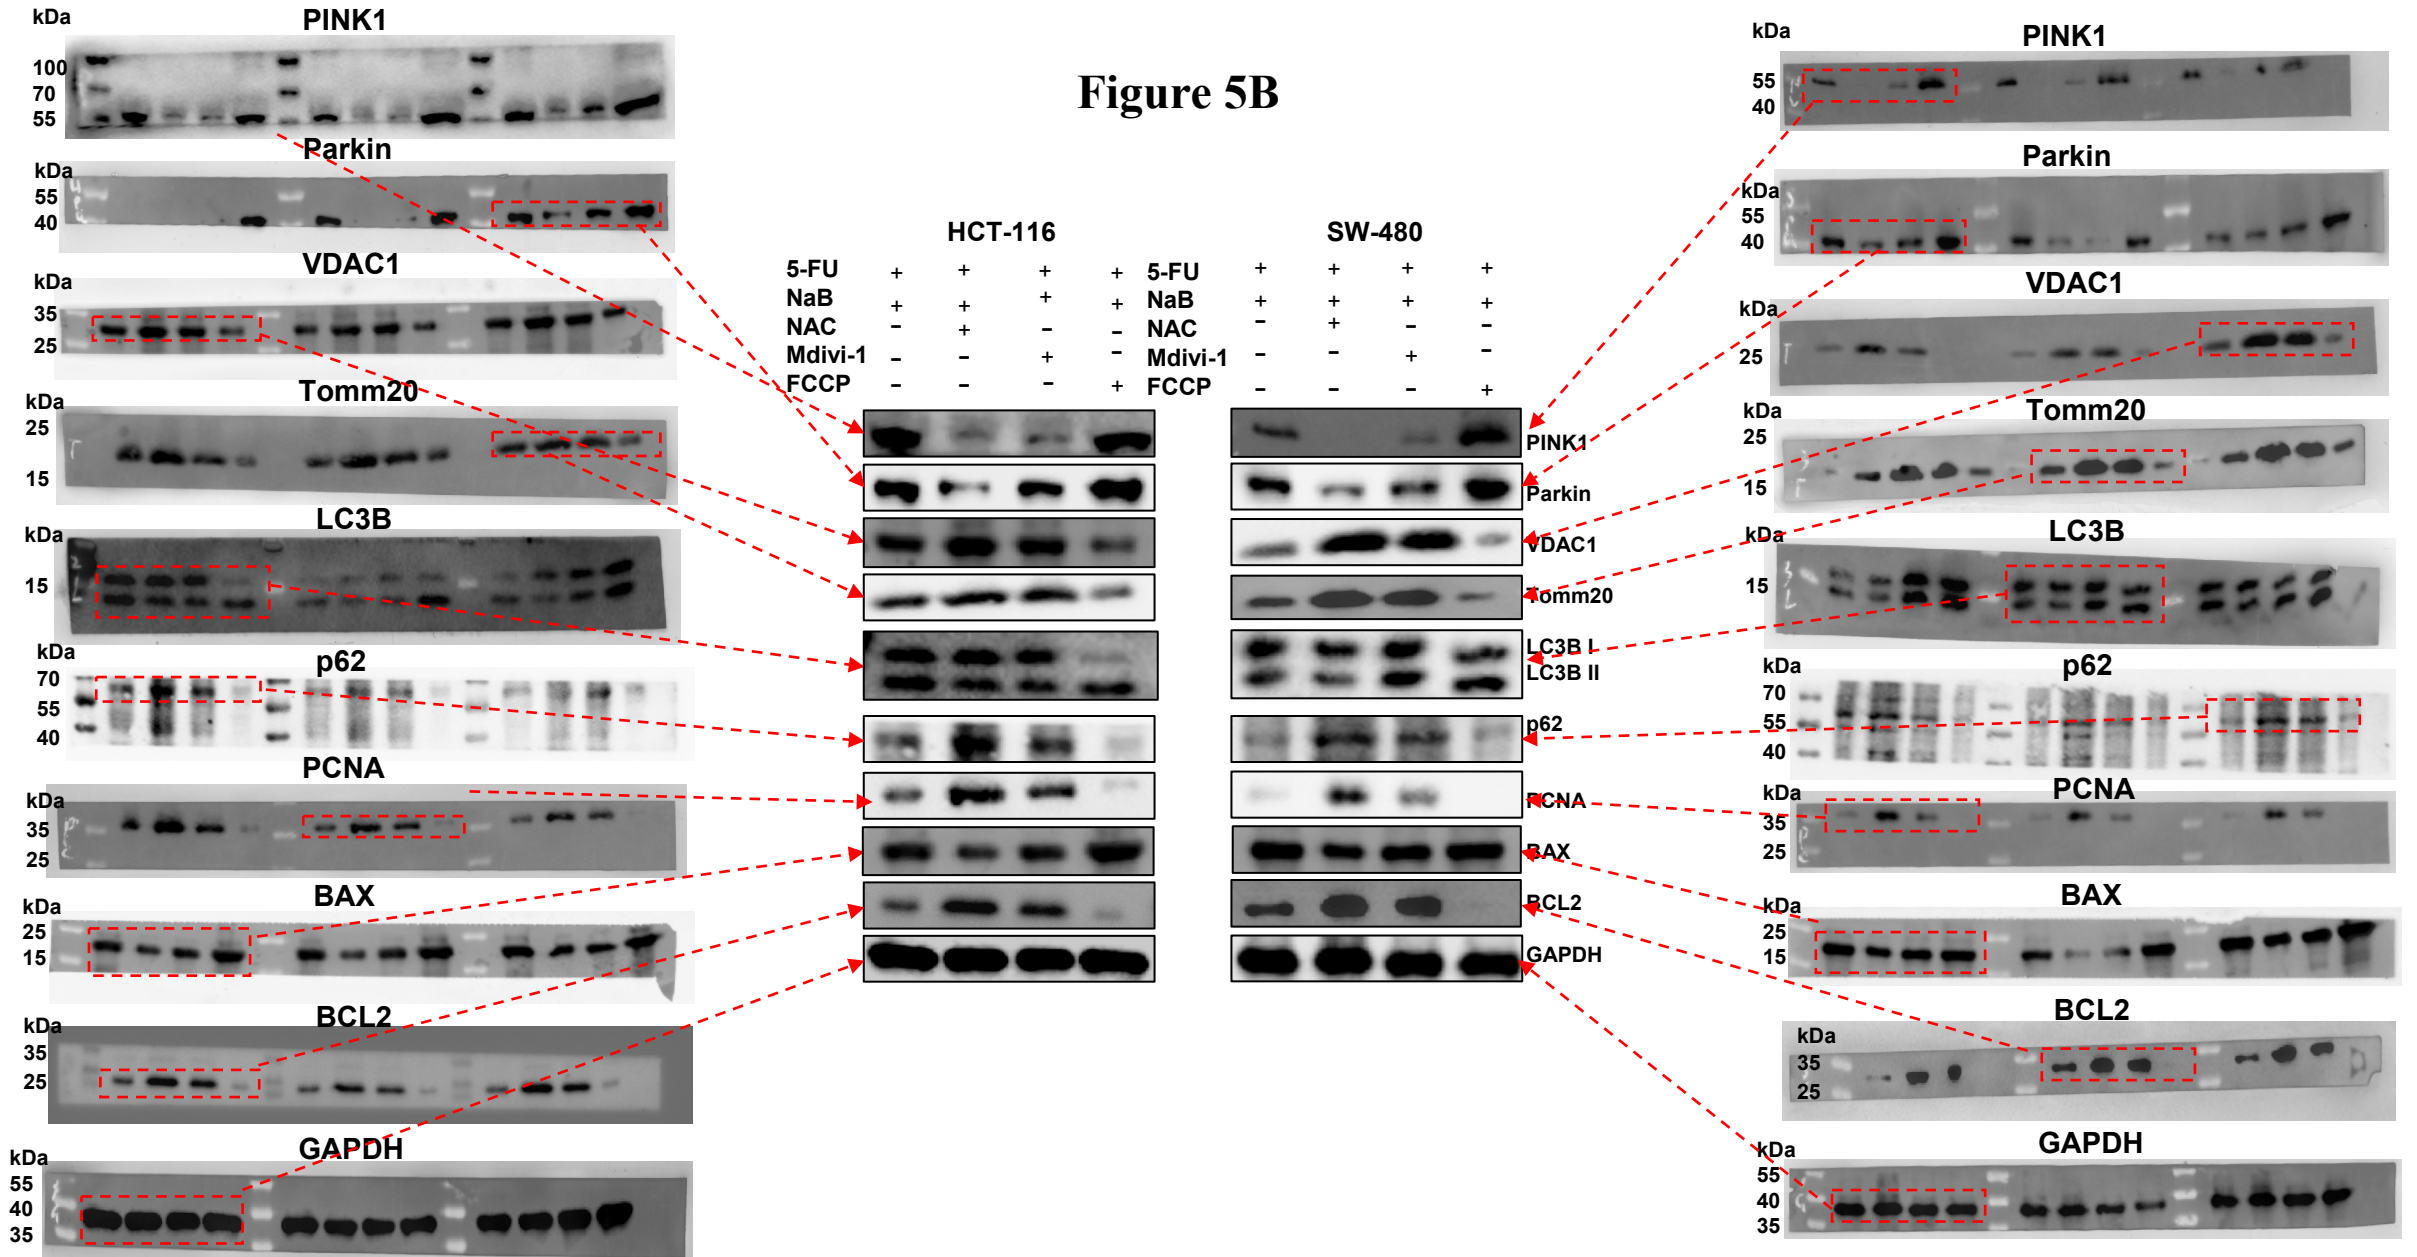

**Figure 6H**

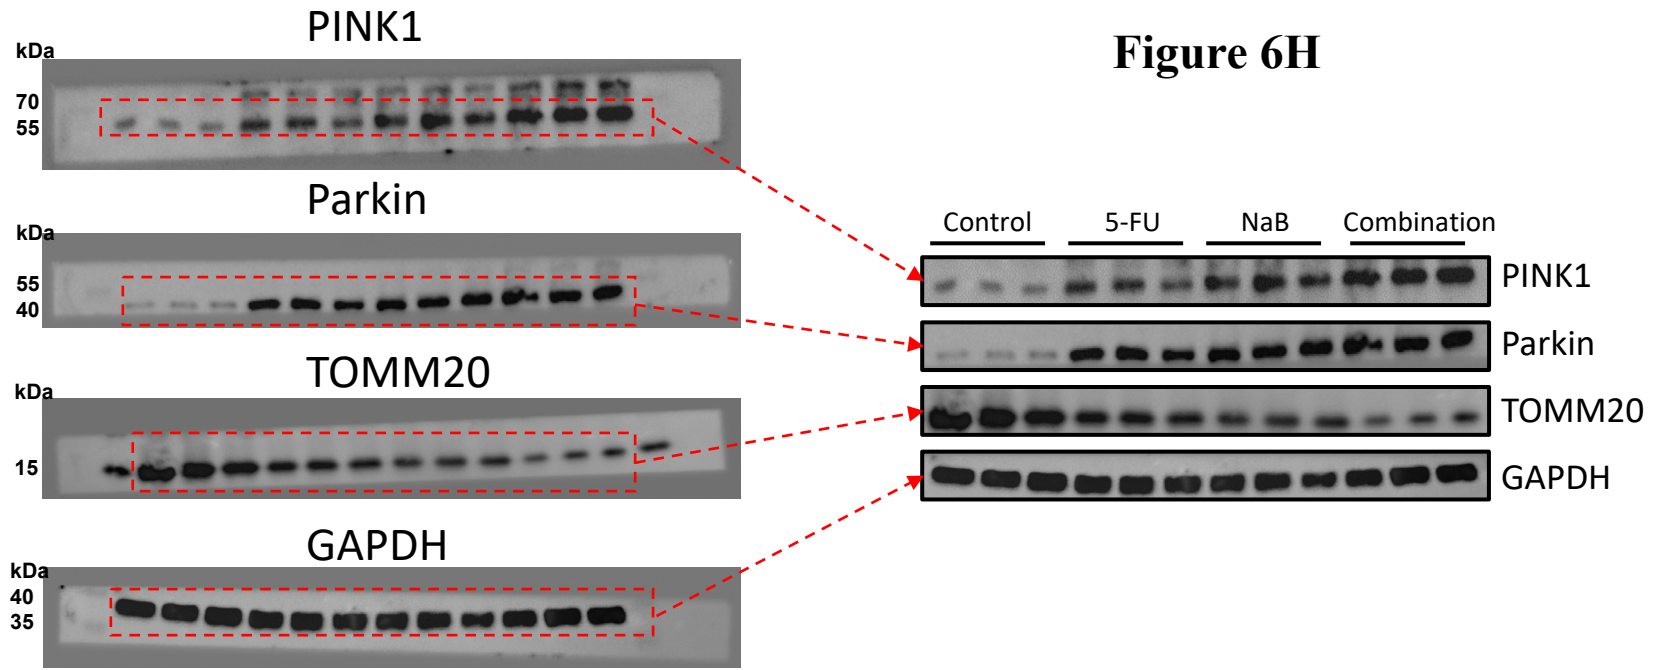

Supplement: 41598_2024_63993_MOESM1_ESM.pdf [file 41598_2024_63993_MOESM1_ESM.pdf]
